# Supplementary material for: Ultrafine cobalt selenide nanowires tangled with MXene nanosheets as highly efficient electrocatalysts toward the hydrogen evolution reaction
Source: Royal Society of Chemistry journal article supplement (doi:10.1039/d2dt00238h), 2022-01-01
Supplement: d2dt00238h1.pdf [file d2dt00238h1.pdf]

## Electronic Supplementary Information

### Ultrafine cobalt selenide nanowires tangled with MXene nanosheets as highly-efficient electrocatalysts toward the hydrogen evolution reaction

Linlin Hao, Haiyan He,\* Chenyu Xu, Mingqiang Zhang, Haoxuan Feng, Lu Yang, Quanguo Jiang,

Huajie Huang\*

College of Mechanics and Materials, Hohai University, Nanjing 210098, China

\*E-mail: he.haiyan@hhu.edu.cn or huanghuajie@hhu.edu.cn

#### Supplementary Results

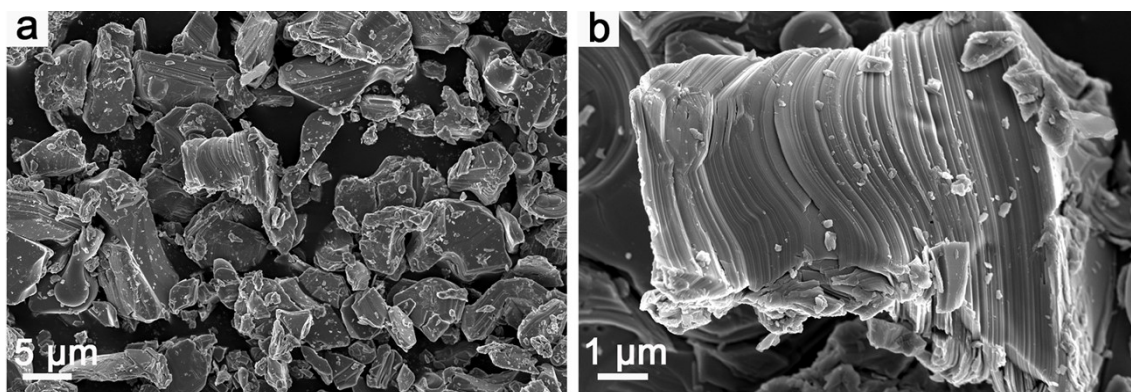

**Fig. S1** Representative SEM images of bulk Ti<sub>3</sub>AlC<sub>2</sub> at different magnifications.

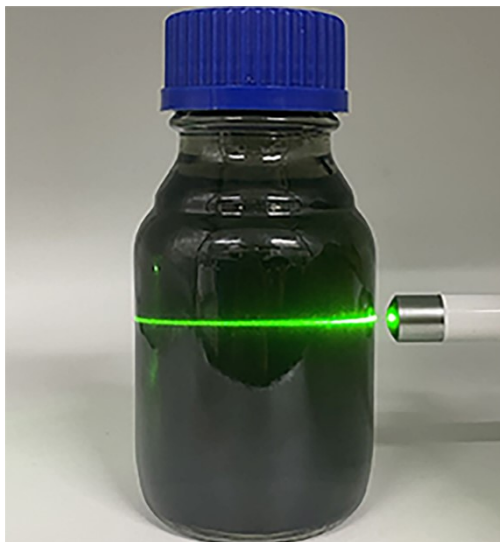

**Fig. S2** The Tyndall phenomenon of the as-obtained  $\text{Ti}_3\text{C}_2\text{T}_x$  MXene suspension.

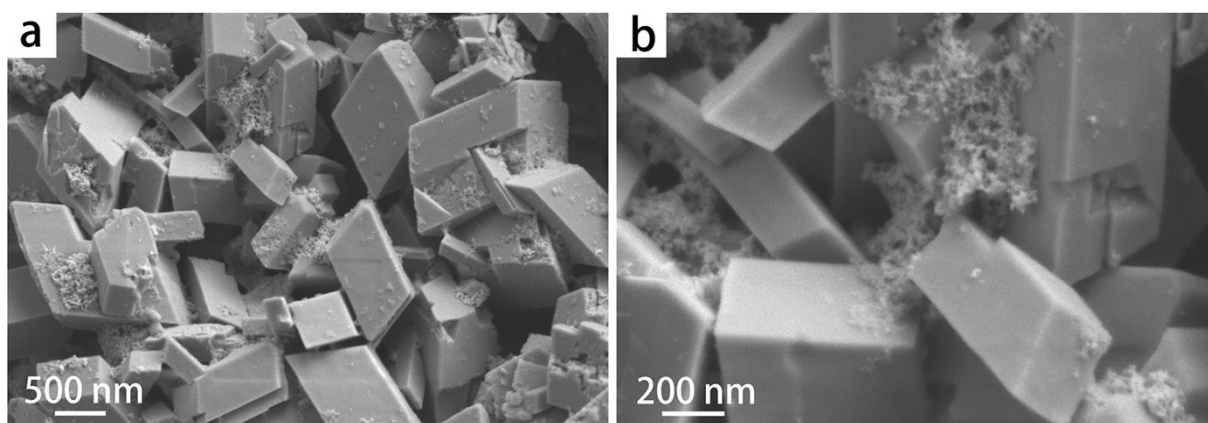

**Fig. S3** Representative SEM images of bare CoSe at different magnifications.

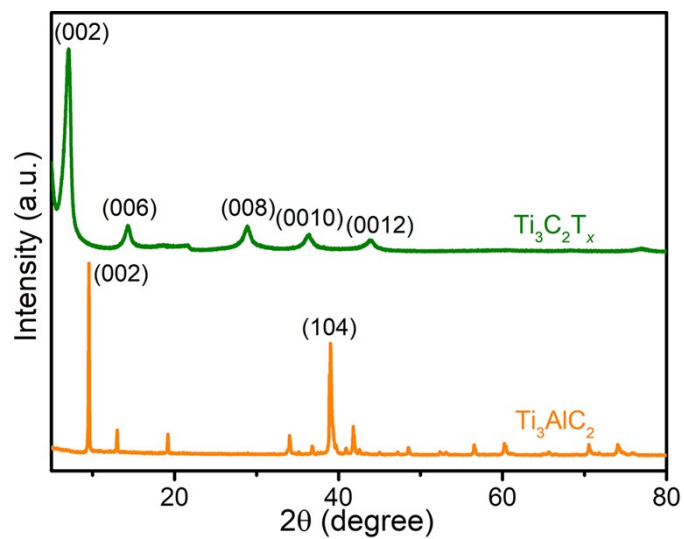

**Fig. S4** Typical XRD patterns of  $Ti_3C_2T_x$  nanosheets and  $Ti_3AlC_2$  powder.

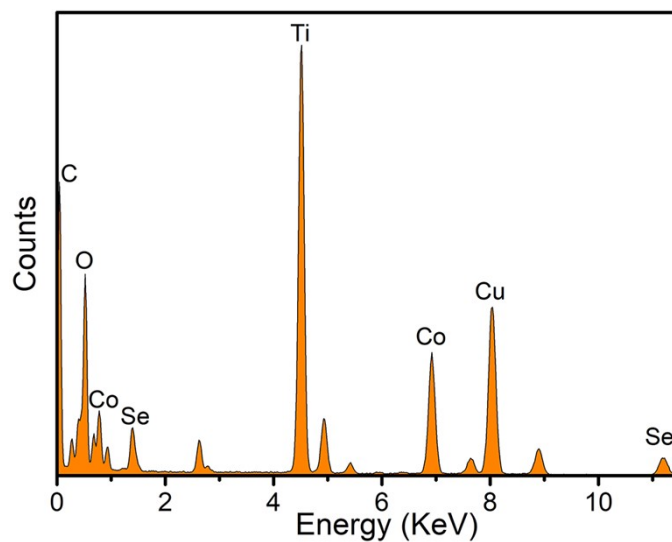

**Fig. S5.** EDX spectrum of the CoSe NW/ $Ti_3C_2T_x$  nanoarchitecture on copper mesh discloses the presence of Ti, C, Se and Co components in the composite.

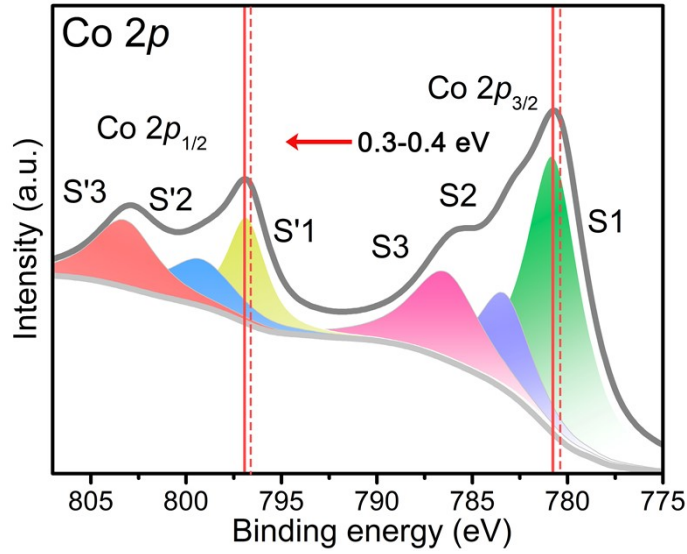

**Fig. S6.** The comparison of Co 2p XPS peaks of CoSe NW/Ti<sub>3</sub>C<sub>2</sub>T<sub>x</sub> with that of bare CoSe.

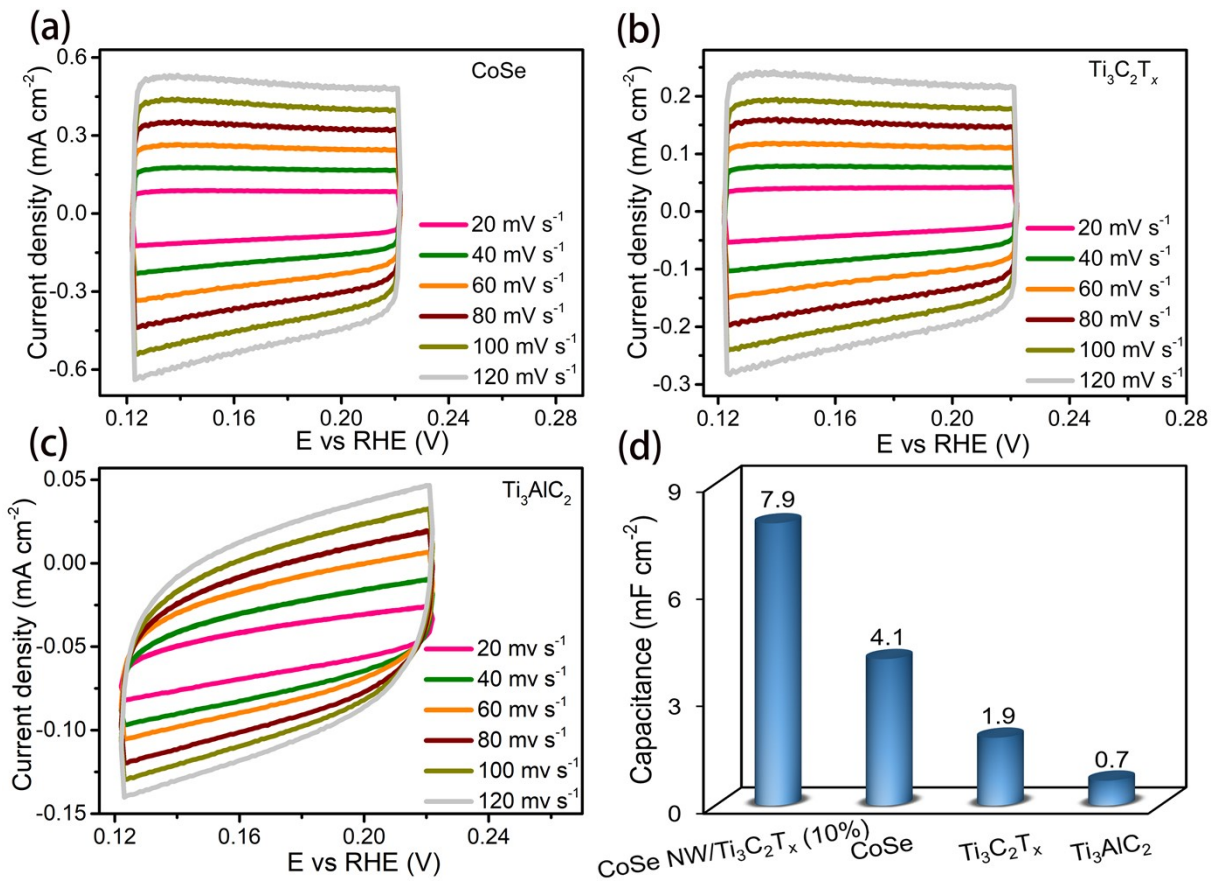

**Fig. S7.** The CV curve for (a) CoSe, (b) Ti<sub>3</sub>C<sub>2</sub>T<sub>x</sub> and (c) Ti<sub>3</sub>AlC<sub>2</sub> at potential from 120 mV to 220 mV vs. RHE at scan rates from 20 to 120 mV s<sup>-1</sup>. (d) The electrochemical double layer capacitance (C<sub>dl</sub>) value of CoSe NW/Ti<sub>3</sub>C<sub>2</sub>T<sub>x</sub>(5%), CoSe, Ti<sub>3</sub>C<sub>2</sub>T<sub>x</sub> and Ti<sub>3</sub>AlC<sub>2</sub>.

**Table S1.** Comparison of hydrogen evolution reaction activity for the CoSe NW/Ti<sub>3</sub>C<sub>2</sub>T<sub>x</sub>(10%) catalyst with recent state-of-the-art .

| Type of electrocatalyst                                  | Electrolyte                          | Onset potential (mV) | Tafel slope (mV dec <sup>-1</sup> ) | Ref.      |
|----------------------------------------------------------|--------------------------------------|----------------------|-------------------------------------|-----------|
| CoSe NW/Ti <sub>3</sub> C <sub>2</sub> T <sub>x</sub>    | 0.5 M H <sub>2</sub> SO <sub>4</sub> | 84                   | 56                                  | This work |
| MoSe <sub>2-x</sub>                                      | 0.5 M H <sub>2</sub> SO <sub>4</sub> | N.A.                 | 98                                  | S1        |
| Co <sub>0.9</sub> Ni <sub>0.1</sub> Se                   | 0.5 M H <sub>2</sub> SO <sub>4</sub> | N.A.                 | 58                                  | S2        |
| Co <sub>0.8</sub> Mo <sub>0.2</sub> Se                   | 0.5 M H <sub>2</sub> SO <sub>4</sub> | N.A.                 | ~59                                 | S3        |
| CoSe/MoSe <sub>2</sub>                                   | 0.5 M H <sub>2</sub> SO <sub>4</sub> | N.A.                 | 62                                  | S4        |
| MoSe <sub>2</sub> /NiSe                                  | 0.5 M H <sub>2</sub> SO <sub>4</sub> | 150                  | 56                                  | S5        |
| CoSe <sub>2</sub> /CNT                                   | 0.5 M H <sub>2</sub> SO <sub>4</sub> | N.A.                 | 98                                  | S6        |
| Pt/Ti <sub>3</sub> C <sub>2</sub> T <sub>x</sub>         | 0.5 M H <sub>2</sub> SO <sub>4</sub> | N.A.                 | 79                                  | S7        |
| Ti <sub>3</sub> C <sub>2</sub> T <sub>x</sub> nanofibers | 0.5 M H <sub>2</sub> SO <sub>4</sub> | ~100                 | 97                                  | S8        |

## References

- S1. X. L. Zhou, J. Jiang, T. Ding, J. J. Zhang, B. C. Pan, J. Zuo and Q. Yang, *Nanoscale*, 2014, **6**, 11046-11051.
- S2. W. W. Zhong, Z. P. Wang, N. Gao, L. G. Huang, Z. P. Lin, Y. P. Liu, F. Q. Meng, J. Deng, S. F. Jin, Q. H. Zhang and L. Gu, *Angew. Chem. Int. Ed.*, 2020, **59**, 22743-22748.
- S3. Y. Zhou, J. T. Zhang, H. Ren, Y. Pan, Y. G. Yan, F. C. Sun, X. Y. Wang, S. T. Wang and J. Zhang, *Appl. Catal. B*, 2020, **268**, 118467.
- S4. W. Song, K. L. Wang, G. P. Jin, Z. B. Wang, C. X. Li, X. M. Yang and C. N. Chen,

*ChemElectroChem*, 2019, **6**, 4842-4847.

S5. X. L. Zhou, Y. Liu, H. X. Ju, B. C. Pan, J. F. Zhu, T. Ding, C. D. Wang and Q. Yang, *Chem. Mater.*, 2016, **28**, 1838-1846.

S6. H. Ding, G. C. Xu, L. Zhang, B. Wei, J. C. Hei and L. Chen, *J. Colloid Interface Sci.*, 2020, **566**, 296-303.

S7. B. S. Li, R. K. Ye, Q. Y. Wang, X. Q. Liu, P. P. Fang and J. Q. Hu, *Ionics*, 2021, **27**, 1221-1231.

S8. W. Y. Yuan, L. F. Cheng, Y. R. An, H. Wu, N. Yao, X. L. Fan and X. H. Guo, *ACS Sustain. Chem. Eng.*, 2018, **6**, 8976-8982.
